# Supplementary material for: Validation of a microwave-assisted extraction gas chromatography detection method for the determination of fungicides in grapes
Source: Royal Society of Chemistry journal article supplement (doi:10.1039/c1ay05406f), 2011-01-01
Supplement: c1ay05406f.pdf [file c1ay05406f.pdf]

File Name : Figure I.TIF

Caption : Recovery data with different solvents
